# Supplementary material for: Cross-country survey on the decommissioning of commercial nuclear reactors: status, insights, and knowledge gaps
Source: Copernicus journal article supplement (doi:10.5194/sand-2-3-2023), 2023-09-06

Supplement of Saf. Nucl. Waste Disposal, 2, 3–4, 2023  
<https://doi.org/10.5194/sand-2-3-2023-supplement>  
© Author(s) 2023. CC BY 4.0 License.

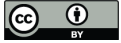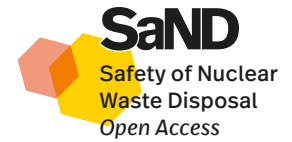

*Supplement of*

## **Cross-country survey on the decommissioning of commercial nuclear reactors: status, insights, and knowledge gaps**

**Rebekka Bärenbold et al.**

*Correspondence to:* Christian von Hirschhausen (cvh@wip.tu-berlin.de)

The copyright of individual parts of the supplement might differ from the article licence.

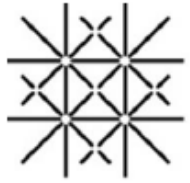

Universität  
Basel

FoNEW  
Forschungsstelle für  
Nachhaltige Energie-  
und Wasserversorgung

safeND, Berlin  
14.09.2023

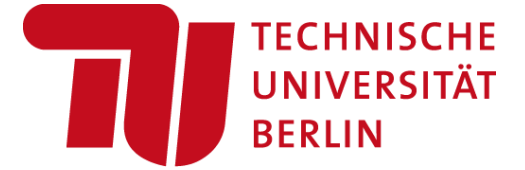

TECHNISCHE  
UNIVERSITÄT  
BERLIN

# Cross-Country Survey on the Decommissioning of Commercial Nuclear Reactors: Status, Insights and Knowledge Gaps

Rebekka Bärenbold<sup>1</sup>, Muhammad Maladoh Bah<sup>1</sup>, Rebecca Lordan-Perret<sup>1</sup>, Björn Steigerwald<sup>2,3</sup>, Christian von Hirschhausen<sup>2,3</sup>, Ben Wealer<sup>2</sup>, Hannes Weigt<sup>1</sup>, Alexander Wimmers<sup>2,3</sup>

1: University of Basel, Switzerland

2: Technische Universität Berlin (TU Berlin), Germany

3: DIW Berlin, Germany

# Agenda

**1** Motivation and Background

**2** Our Case Studies

**3** Results and Insights

# Nuclear Power as a System Good

## Stylized Description

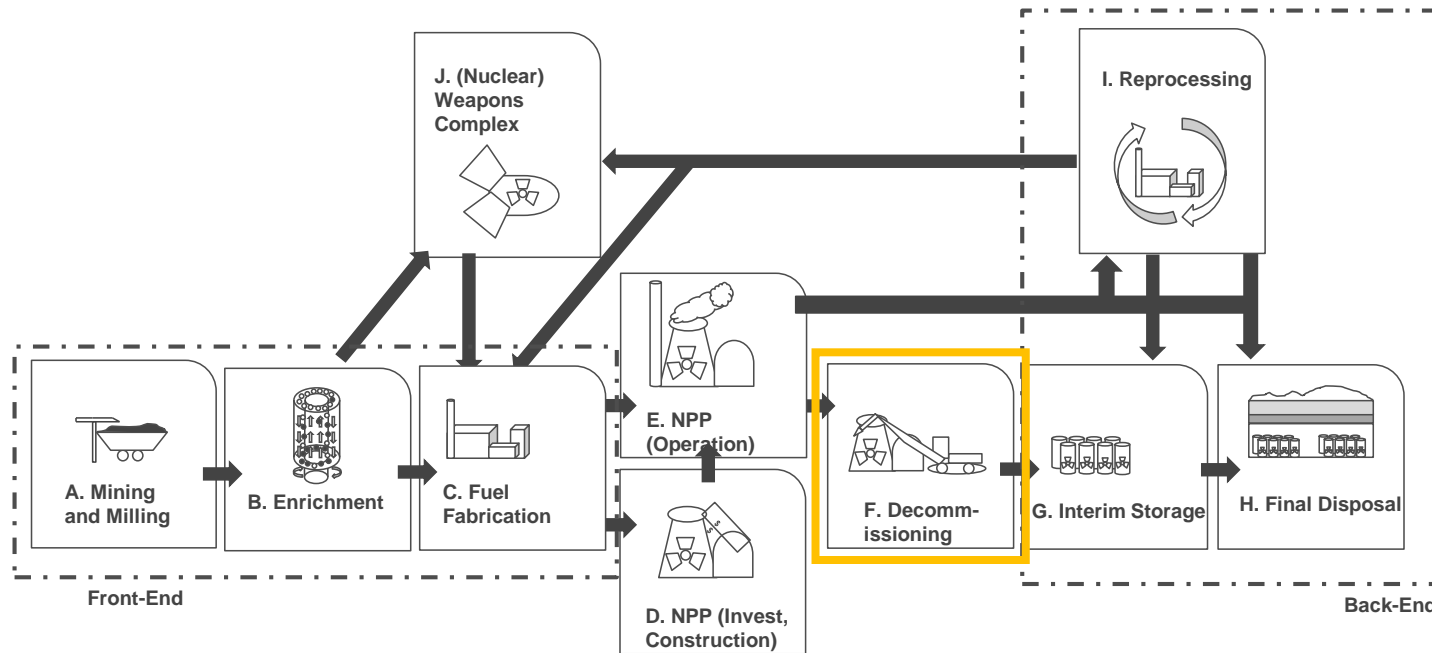

- Nuclear decommissioning is conducted once a nuclear reactor is shut down
- This includes activities from the shutdown itself, the removal of nuclear material and, depending on the target, the environmental restoration of the site
- The process is lengthy and expensive
- From a safety and security view, it is imperative that nuclear reactors are decom. to minimize risk
- Historically, decom. has been neglected as a distant obligation
- In some cases, the combination of inexperience and insufficient planning led to undesired outcomes

Taken from Wealer & von Hirschhausen (2020) Nuclear power as a system good: Organizational models for production along the value-added chain.  
DIW Discussion Paper 1883. URL: <http://hdl.handle.net/10419/222865>.

# Nuclear Decommissioning

## Relevance of Nuclear Decommissioning

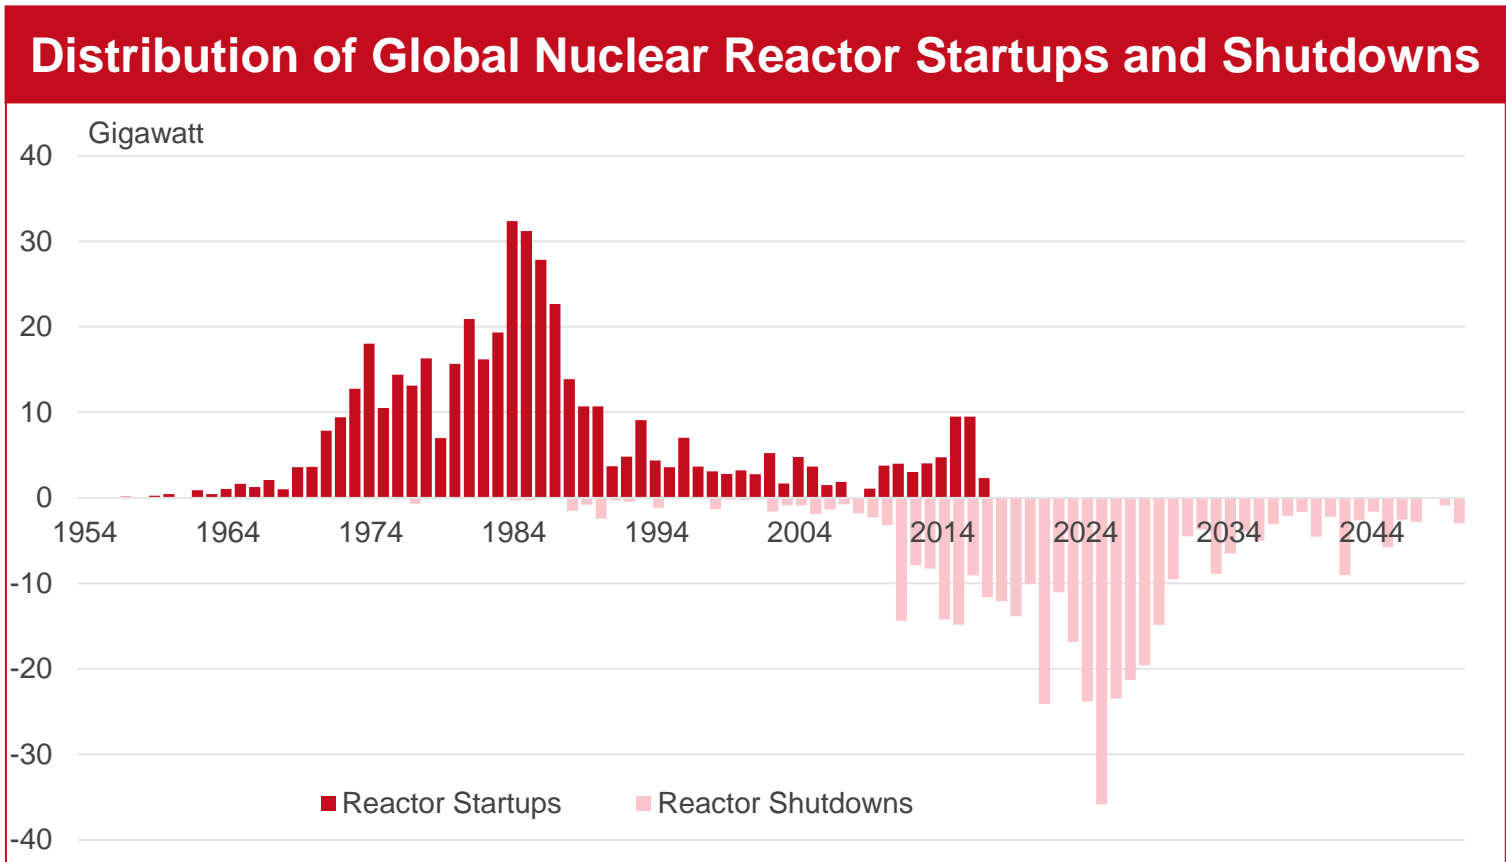

- Assuming a 40-year lifetime, many reactors built in the 1980s will begin shutting down in the coming years
- All of these reactors will have to be decom. at some point
- Lifetime extensions (50, 60 or 80 years) can only push this inevitability into the future
- The global decom. industry is still developing and remains largely untested as only around a dozen commercial reactors have been fully decommissioned

Taken from Wealer et al. (2018) Nuclear Power Reactors Worldwide – Technology Developments, Diffusion Patterns, and Country-by-Country Analysis of Implementation (1951–2017). DIW Data Documentation 104. URL: <http://hdl.handle.net/10419/179000>

# Nuclear Decommissioning Strategies and Technical Approach

## STRATEGIES

### Direct Dismantling

- Decom. is conducted directly after shutdown of the NPP
- Institutional knowledge of on-site personnel can be utilized
- Faster release of site for other use
- Most often used strategy

### Deferred Dismantling

- After shutdown, the NPP is placed into “longterm enclosure” for years to decades
- This reduces hazards through radiation as radioisotopes decay

### Entombment

- Remaining radioactive material is permanently encapsulated on site
- Typically, this strategy is an appropriate strategy after an accident

## TECHNICAL APPROACH

### Warm-Up Stage

- Includes post-operational phase and preparatory tasks
- Reactor core is defueled and first components are removed

### Hot-Zone Stage

- Highly contaminated parts (e.g., reactor pressure vessel) are removed
- It is the most dangerous, complex and costly part of the process

### Ease-Off Stage

- Buildings and remaining components are decontaminated and demolished
- Depending on the target (greenfield vs. brownfield), the landscape may be remediated

## Our Research

- We explore the current situation in **six countries**: France, Germany, USA, UK, Switzerland and Sweden
- We want to understand what the existing **institutional, regulatory** and legal, **financial**, and **technical regimes** for decommissioning in these countries are
- We identify **insights** from comparing the countries' approaches in order to **identify research gaps**
- In our ongoing project, we subsequently aim at answering some of these gaps
- Others can be picked up by future research

# Agenda

**1** Motivation and Background

**2** Our Case Studies

**3** Results and Insights



# Case Study Overview

## General Information

### France

- 56 (somewhat) homogeneous NPPs operational that account for 2/3 of electricity generation
- New build ongoing at Flammanville
- Single utility responsible (EDF)

### Germany

- Since April 2023, end of commercial operation of nuclear power reactors
- Parallel decommissioning ongoing at over 30 reactors
- Diverse ownership structure, special case for GDR legacy fleet

### Sweden

- 30% of Swedish electricity generated by 13 nuclear reactors
- Legal pathway for new reactor construction paved in 2022

### Switzerland

- 4 operational NPPs generate 1/3 of Swiss electricity
- End of commercial operation planned for 2040s
- Prohibition on nuclear new builds by law since 2017

### United Kingdom

- 10 reactors account for 15% of British electricity generation
- Fleet consists of mainly gas-cooled reactors, so-called “legacy” fleet of Magnox reactors challenging
- New build ongoing (Hinkley Point C)

### United States

- Largest commercial power reactor fleet worldwide (92 operating)
- Significant support schemes for nuclear power in place
- New build at Vogtle Station delayed and expensive

# Case Study Overview

## Decommissioning progress as of June 2022

| Country     | Closed reactors (total) | Warm-Up | Hot-Zone | Ease-Off | LTE | Radiologically Decommissioned (of which are Greenfield) |
|-------------|-------------------------|---------|----------|----------|-----|---------------------------------------------------------|
| France      | 14                      | 4       | 2        | 0        | 8   | 0 (0)                                                   |
| Germany     | 30                      | 9       | 8        | 9        | 1   | 4 (3)                                                   |
| Sweden      | 7                       | 3       | 4        | 0        | 0   | 0 (0)                                                   |
| Switzerland | 1                       | 1       | 0        | 0        | 0   | 0 (0)                                                   |
| UK          | 34                      | 13      | 9        | 0        | 8   | 0 (0)                                                   |
| USA         | 41                      | 7       | 3        | 1        | 13  | 17 (6)                                                  |

Of our case study countries, only Germany and the USA have completed decommissioning at some reactors. Most projects have been ongoing for years (or work has not yet begun).

# Agenda

**1** Motivation and Background

**2** Our Case Studies

**3** Results and Insights

# Insights and Research Gaps Overview

**Organization / Regulation**

**Financing**

**Production**

**Waste Management**

# Insights and Research Gaps

## Organization of Ownership as of October 2022

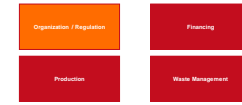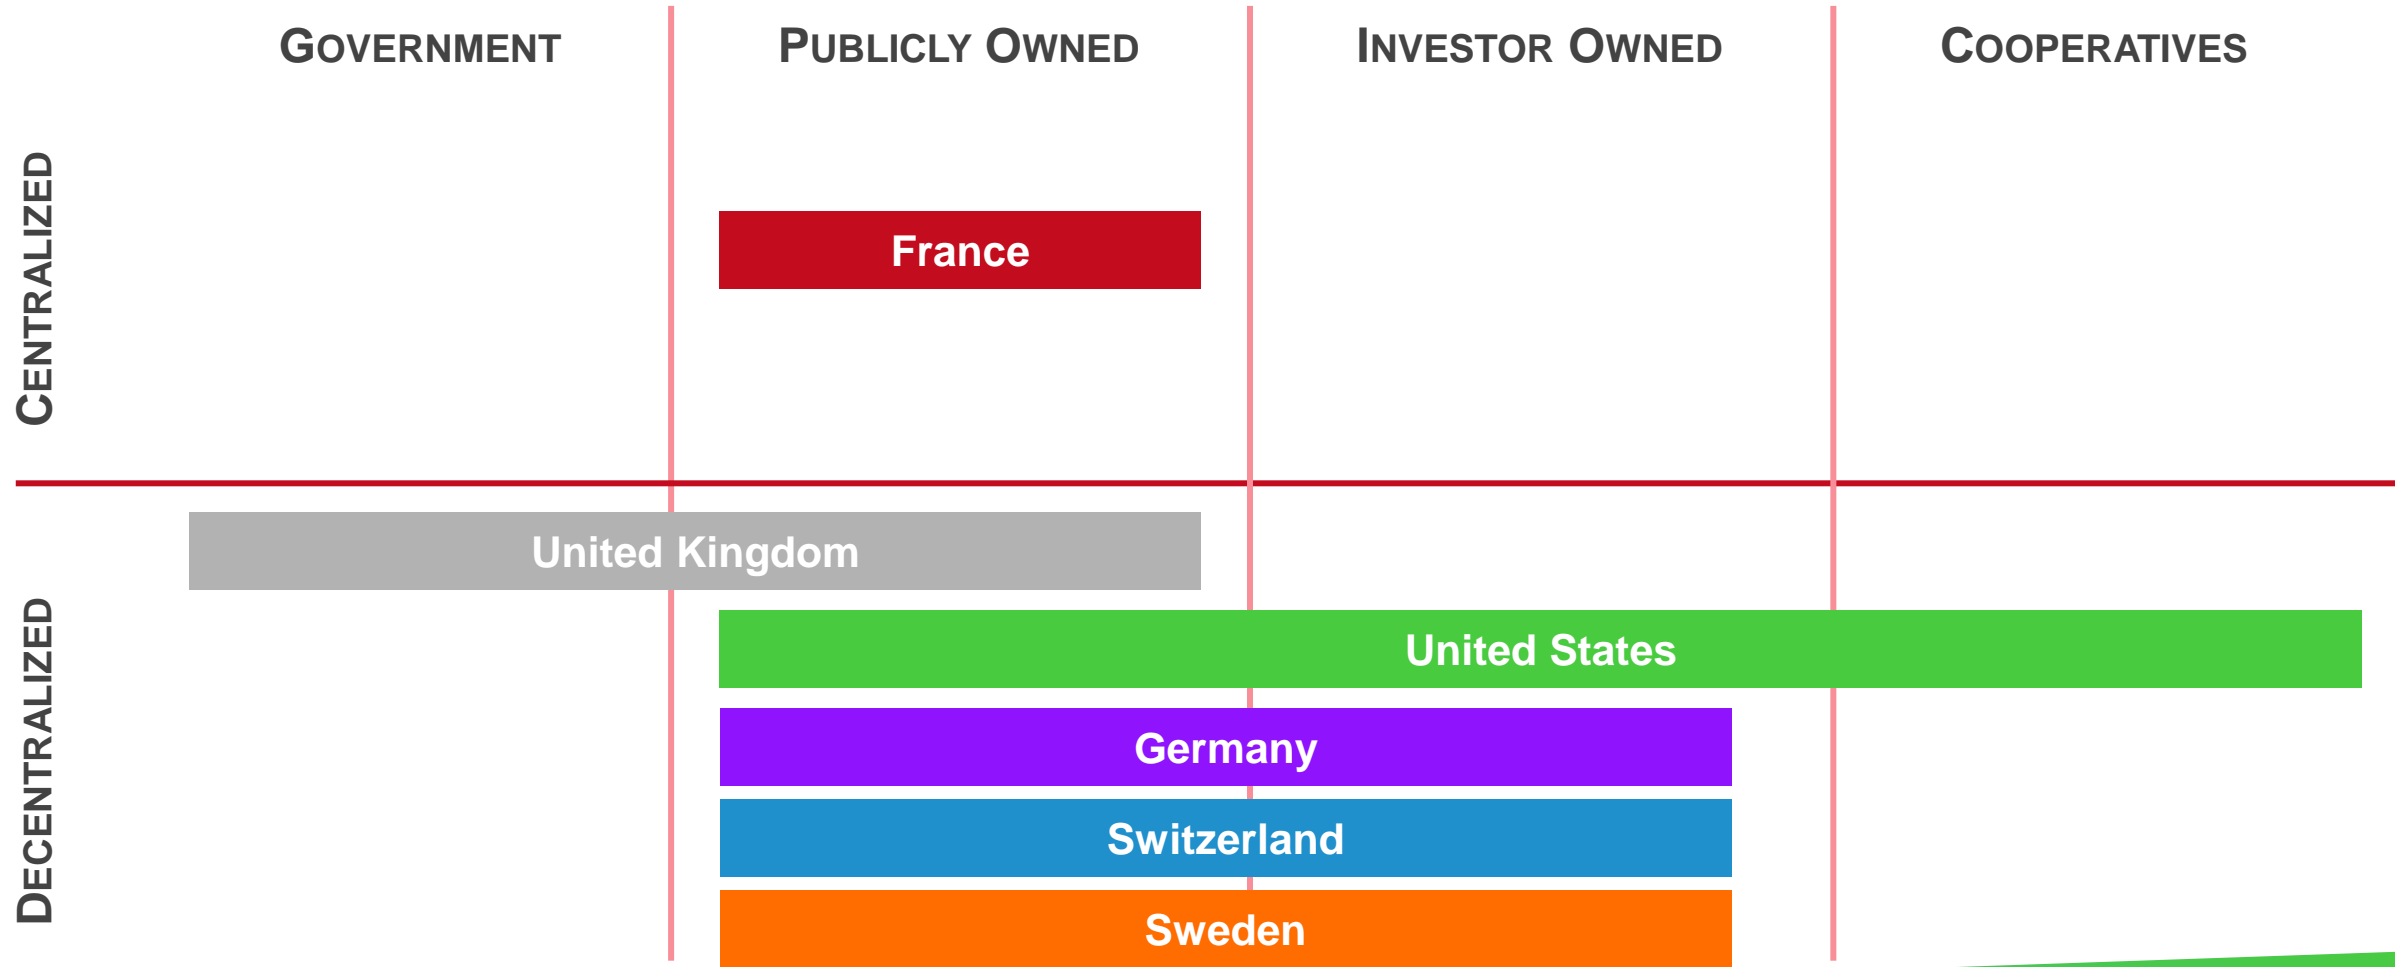

# Insights and Research Gaps

## Organization and Regulation



### Organization / Regulation

#### Interlinkage between ownership and nuclear decom.

- **Direct influence of ownership** on decommissioning via financing, scheduling, production of decom. work and liability for unfunded work
- Possible **differences of incentivation** for swift, safe and cost-efficient decommissioning for private owners vs. government owners

#### Influence of regulatory framework on nuclear decom.

- Decommissioning process **highly dependent on country-specific laws and regulations**
- These differ amongst countries, e.g., in terms of responsible agencies (several vs. a single agency)
- Key challenge for “newcomer” countries is to harmonize domestic with foreign regulations

# Insights and Research Gaps

## Financing of Nuclear Decommissioning

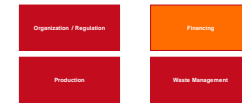

|               | PUBLIC BUDGET                        | INTERNAL SEGREGATED | INTERNAL NON-SEGREGATED | EXTERNAL SEGREGATED                                                         | GUARANTEES |
|---------------|--------------------------------------|---------------------|-------------------------|-----------------------------------------------------------------------------|------------|
| STATE FUNDED  | <p>United Kingdom</p> <p>Germany</p> |                     |                         |                                                                             |            |
| POLLUTER PAYS |                                      | <p>France</p>       | <p>Germany</p>          | <p>United Kingdom</p> <p>United States</p> <p>Switzerland</p> <p>Sweden</p> |            |

# Insights and Research Gaps

## Financing

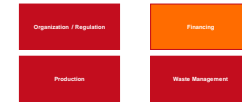

### Financing

#### Improving of cost and contingency estimations

- Cost estimations vary significantly; historically **costs** have been **underestimated**
- **Accurate estimations** might help reduce liability risks and understand incentivations of actors

#### Decommissioning fund adequacy and transparency

- Decommissioning fund volumes are not always publicly accessible and it often remains unclear for what money is used
- **Transparency and increased fund scrutiny** might reduce liability risks

#### Determining financial liability

- In some countries (esp. US), final **financial liability** is **sometimes unclear**
- Understanding how other countries might account for fund shortfalls could increase responsibility for cost-efficient decom.

#### External influences on decommissioning funds

- Market development can influence decommissioning funds that are often accumulated over NPP lifetime
- **Identifying influences and potential risks** for these funds could increase **fund resilience**



# Insights and Research Gaps

## Production of Nuclear Decommissioning

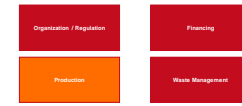

### MAKE

French PWR fleet

UK PWR

Former GDR Legacy Fleet

Switzerland

### HYBRID

French “special” fleet

UK Legacy + AGR fleets

West German NPPs

Sweden

United States

### BUY

# Insights and Research Gaps

## Production



### Production

#### The make or buy decom. production decision

- Nuclear reactors are **highly asset specific**, resulting in limited number of actors active in the market
- No country follows a single approach
- External or internal conditions must exist that influence decisions

#### The role and influence of specialized firms

- Highly **specialized actors** are emerging in the decom. market
- These specialists have begun to take over whole to-be-decommissioned plants or are responsible for full reactor fleets
- Possible **efficiency increases through specialization** might occur

#### Developing the decommissioning supply chain

- With many NPPs likely to be coming offline at similar times, concerns regarding **possible supply chain bottle necks** are emerging (human capital, specialized material & infrastructure)

#### Inspecting claims of efficiency

- **Parallel decommissioning** of (somewhat) homogeneous reactor fleets are proposed to go hand in hand with efficiency gains
- Past experience (esp. in nuclear construction) shows that such claims were historically unfounded

# Insights and Research Gaps

## Waste Management

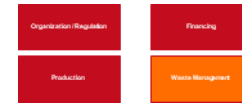

- There are different types of radioactive waste which are disposed of in different types of facilities
- Almost all countries struggle with the management of High-Level Waste (HLW) and Spent Nuclear Fuel (SNF)
- Switzerland, Sweden and France have chosen a site for a deep geological repository to store HLW/ SNF
- Five countries (all except for France) have currently an interim storage facility for HLW/ SNF available
- Low-Level Waste (LLW) is the majority of waste arising from nuclear decommissioning
- Thus, access to LLW facilities might become a critical chokepoint for decommissioning
- Our surveyed countries all have dedicated nuclear waste regulations
- Variation exists in the involvement of the government

# Insights and Research Gaps

## Waste Management

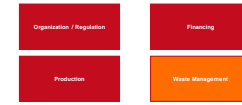

### Waste Management

#### Access to waste disposal facilities

- Worldwide, **no final geological repository for highly radioactive waste is in operation**
- Three of our six countries have identified a location
- **Access to disposal routes** for low, medium and high-level waste is imperative for nuclear decommissioning to succeed
- Currently, most waste is stored **in interim facilities** that might be in operation for many decades
- **Lack of disposal routes probably increases decommissioning duration and cost**

## Conclusion

- Our survey paper brings together insights from six country case studies on decommissioning commercial NPPs
- We focused on organization/ regulation, financing, production and waste management
- The results from our survey shows that there are many differences between the countries, yet similarities arise
- Ultimately, our overarching goal is to find and evaluate best practices in the nuclear decommissioning industry
- Our insights here will help us on this path

## This research is freely accessible

### DIW Data Documentation 104: Decommissioning of Nuclear Power Plants: Regulation, Financing, and Production

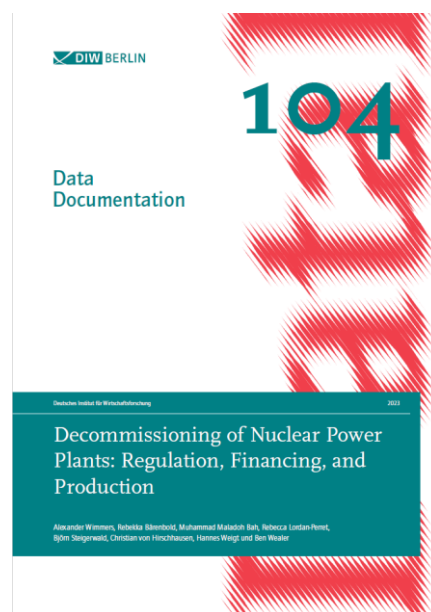

[https://dx.doi.org/10.18723/diw\\_ddc:2023-104](https://dx.doi.org/10.18723/diw_ddc:2023-104)

### WWZ Working Paper 2023/04: Cross-Country Survey on the Decommissioning of Commercial Nuclear Reactors

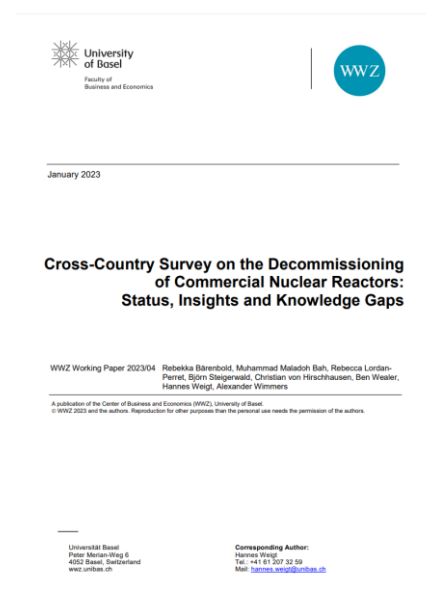

[https://edoc.unibas.ch/93620/1/20230213094735\\_63e9f9279b5a5.pdf](https://edoc.unibas.ch/93620/1/20230213094735_63e9f9279b5a5.pdf)

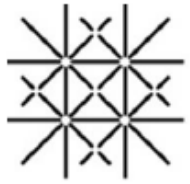

Universität  
Basel

FoNEW  
Forschungsstelle für  
Nachhaltige Energie-  
und Wasserversorgung

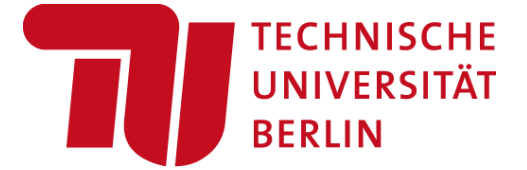

TECHNISCHE  
UNIVERSITÄT  
BERLIN

# Thank you for your attention!

Christian von Hirschhausen

Workgroup for Infrastructure Policy (WIP)  
Technische Universität (TU) Berlin  
Straße des 17. Juni 135  
10623 Berlin  
Germany

E-Mail: [cvh@wip.tu-berlin.de](mailto:cvh@wip.tu-berlin.de)

# BACK-UP | Insights and Research Gaps

## Generalized Regulation

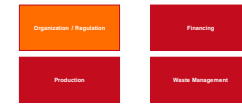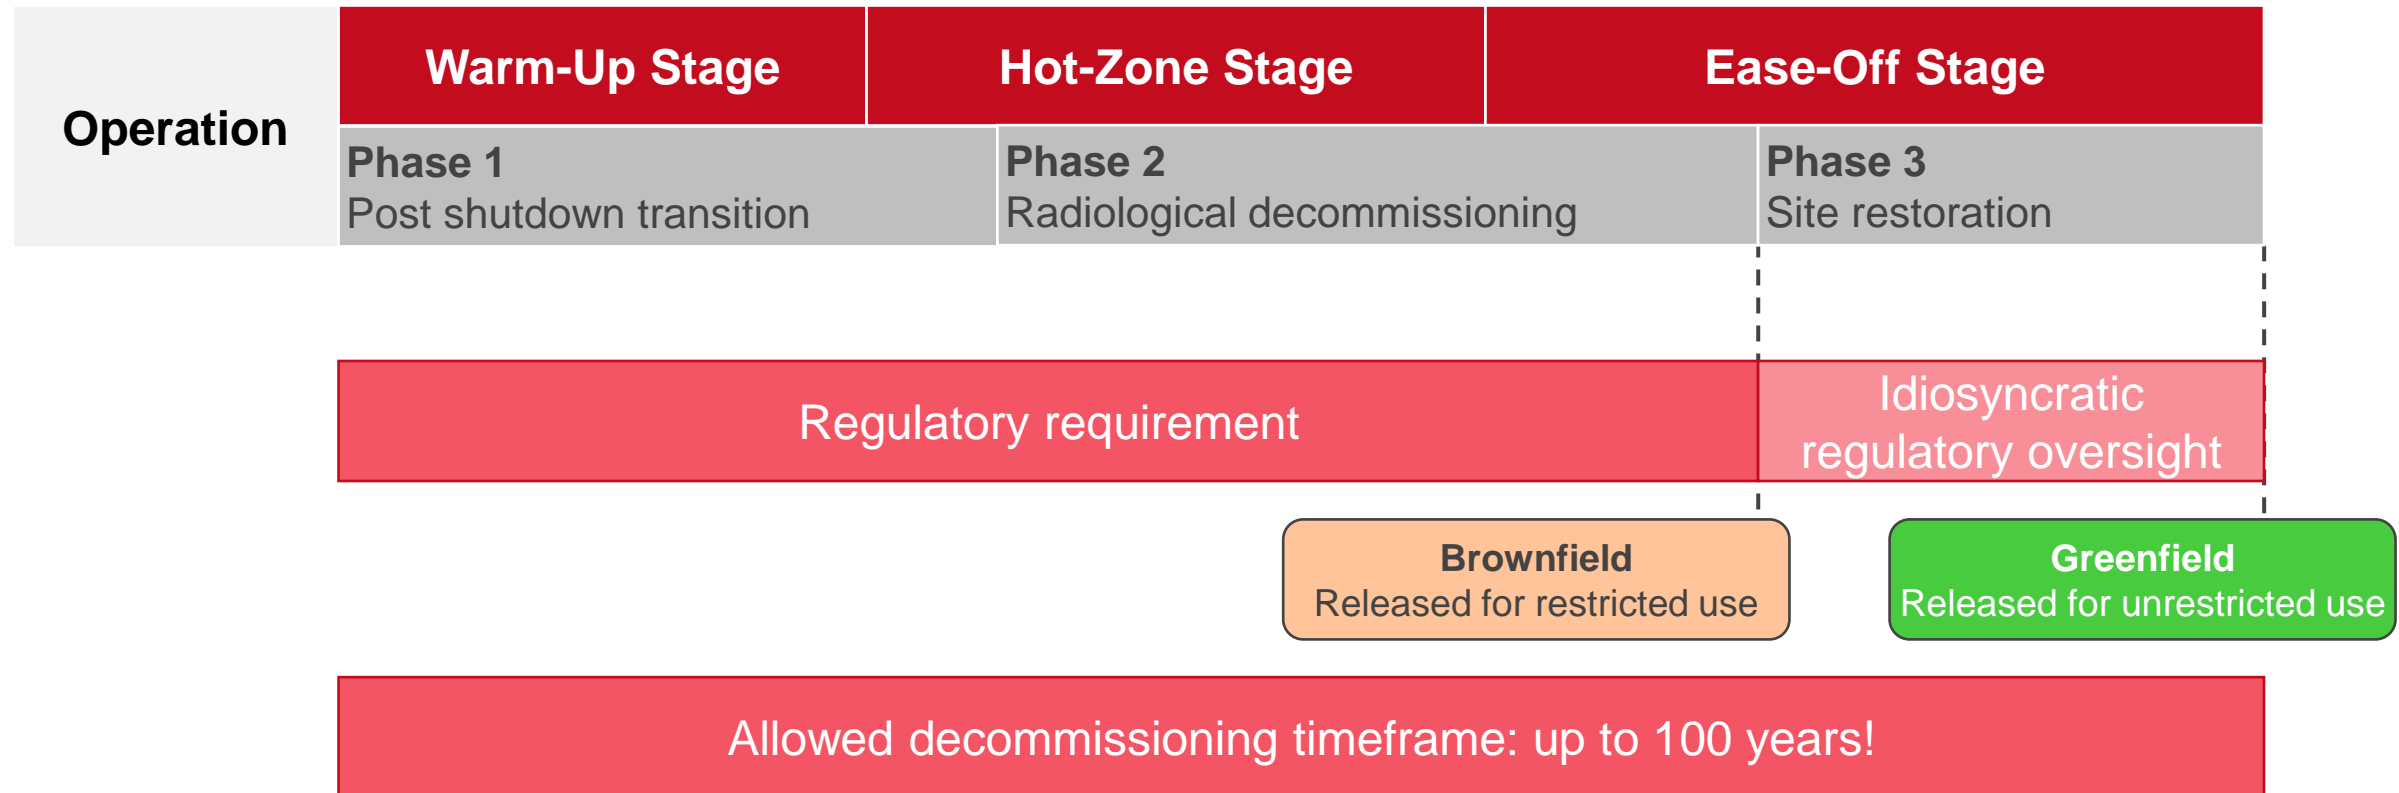

Supplement: Supplementary file 1 [file sand-2-3-2023-supplement.pdf]
